# Supplementary material for: Effect of protein aggregation in wheat-legume mixed pasta diets on their in vitro digestion kinetics in comparison to “rapid” and “slow” animal proteins
Source: PLOS journal article supplement (doi:10.1371/journal.pone.0232425), 2020-05-04
Supplement: S2 (10.1371/journal.pone.0232425.s002) [file journal.pone.0232425.s002]

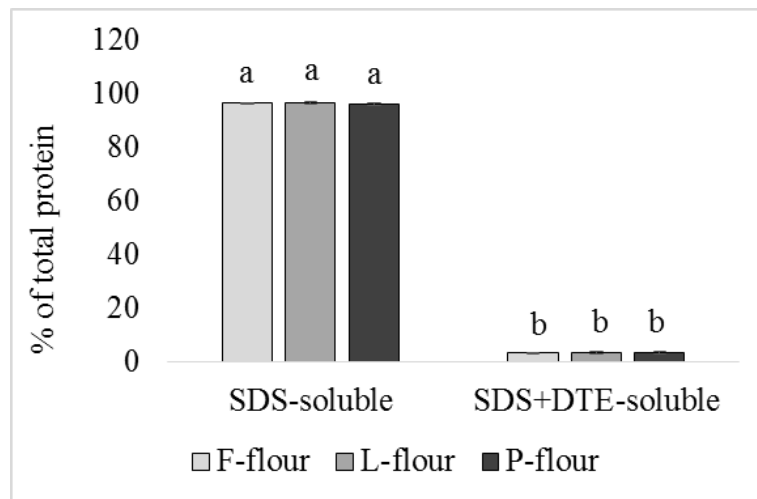

**S2 Fig. Protein aggregation of legume flour by SE-HPLC.** Different letters represent significant difference between groups ( $p < 0.05$ ). F-flour = faba bean flour; L-flour = lentil flour; P-flour = split pea flour.
